1 **Brief Report**

2

3 **Identification of human vaccinees that possess antibodies targeting**  
4 **the egg-adapted hemagglutinin receptor binding site of an H1N1**  
5 **influenza vaccine strain**

6

7 Tyler A. Garretson<sup>1</sup>, Joshua G. Petrie<sup>2</sup>, Emily T. Martin<sup>2</sup>, Arnold S. Monto<sup>2</sup>, Scott E. Hensley<sup>1,\*</sup>

8

9

10 <sup>1</sup>*Department of Microbiology, Perelman School of Medicine, University of Pennsylvania,*  
11 *Philadelphia, Pennsylvania*

12 <sup>2</sup>*Department of Epidemiology, University of Michigan School of Public Health, Ann Arbor,*  
13 *Michigan*

14

15

16

17

18

19

20

21

22

23

24

25

26

27

28

29

30

31

32

33

34

35

36

37

\*corresponding author: 402 Johnson Pavilion, 3610 Hamilton Walk, Philadelphia, PA 19104.  
Phone: (215) 573-3756. Email: [hensley@penmedicine.upenn.edu](mailto:hensley@penmedicine.upenn.edu)

Keywords:

influenza, hemagglutinin, vaccines

33

34

35

36

37

Running title: Egg-adapted H1N1 antibodies

38 **Abstract**

39 Human influenza viruses passaged in eggs often acquire mutations in the hemagglutinin (HA)  
40 receptor binding site (RBS). To determine if egg-adapted H1N1 vaccines commonly elicit  
41 antibodies targeting the egg-adapted RBS of HA, we completed hemagglutinin-inhibition assays  
42 with A/California/7/2009 HA and egg-adapted A/California/7/2009-X-179A HA using sera  
43 collected from 159 humans vaccinated with seasonal influenza vaccines during the 2015-16  
44 season. We found that ~5% of participants had  $\geq 4$ -fold higher antibody titers to the egg-adapted  
45 viral strain compared to wild type viral strain. We used reverse-genetics to demonstrate that a  
46 single egg-adapted HA RBS mutation (Q226R) was responsible for this phenotype.

47

48

49

50

## 51 **Introduction**

52           Influenza viruses attach to cells through specific interactions between the viral  
53 hemagglutinin (HA) protein and terminally-linked sialic acids on target cells. Human influenza  
54 viruses possess a conserved HA receptor binding site (RBS) that interacts efficiently with  $\alpha$ -2,6-  
55 linked sialic acids, whereas the HA RBS of avian influenza strains primarily interacts with  $\alpha$ -2,3-  
56 linked sialic acids [1]. Most human influenza vaccine antigens are prepared from viruses grown  
57 in fertilized chicken eggs. Human influenza viruses grown in eggs often acquire mutations in or  
58 near the HA RBS that increase binding to  $\alpha$ -2,3-linked sialic acids, and some of these mutations  
59 lead to large antigenic changes [2]. For example, the 2016-17 H3N2 egg-grown vaccine was  
60 antigenically mismatched compared to circulating H3N2 strains due to a T160K HA mutation  
61 that arose during egg passage [3]. In this case, the egg-adapted T160K HA mutation was  
62 located in a classic antigenic site adjacent to the RBS [3].

63           Recent studies have identified antibodies with long CDR3 domains that essentially act  
64 like sialic acid mimics that make physical contact with HA RBS residues [4, 5]. There is  
65 considerable interest in developing vaccines that elicit these types of antibodies since they are  
66 able to neutralize a wide range of different influenza virus strains. It is unclear if vaccine strains  
67 with egg-adapted RBSs are able to elicit these broadly reactive antibodies, given that most egg-  
68 grown vaccine strains possess RBS mutations that facilitate growth in eggs. In a landmark  
69 study, Raymond and colleagues isolated monoclonal antibodies from vaccinated humans that  
70 bind to the egg-adapted RBS of H1N1 but not to circulating H1N1 viral strains [6]. These  
71 antibodies bind to egg-grown H1N1 viral strains that utilize  $\alpha$ -2,3-linked sialic acids but not to  
72 viral strains that actually circulate in humans that utilize  $\alpha$ -2,6-linked sialic acids [6]. It is  
73 unknown if these types of antibodies are commonly elicited by egg-adapted H1N1 vaccine  
74 strains. To address this, we completed hemagglutination-inhibition (HAI) assays with ‘wild-type’  
75 H1N1 HA (A/California/7/2009) and ‘egg-adapted’ H1N1 HA (A/California/7/2009-X-179A) using

76 sera collected from 159 individuals pre- and post-vaccination with the egg-adapted 2015-2016  
77 seasonal influenza vaccine.

78

## 79 **Methods**

80 Prior to the 2015-2016 influenza season, individuals were enrolled in the University of  
81 Michigan Household Influenza Vaccine Effectiveness (HIVE) study, as previously described [7,  
82 8]. Households were defined as having  $\geq 4$  members, of which  $\geq 2$  were children under age 18.  
83 Over the course of the 2015-16 influenza season, nasal and throat swab samples were  
84 collected from participants that displayed symptoms of acute respiratory illnesses and these  
85 samples were tested for influenza virus by real-time reverse-transcription polymerase chain  
86 reaction (RT-PCR). For this study, we analyzed sera from participants that received a seasonal  
87 influenza vaccine (97% received Sanofi Pasteur vaccine, 1% received GSK vaccine, 2%  
88 vaccine type unknown). Serum samples were collected from participants ages  $\geq 13$  years at the  
89 time of enrollment and also  $\geq 14$  days following vaccination. Informed consent was obtained and  
90 the study was approved by the University of Michigan Medical School Institutional Review  
91 Board.

92 HAI assays were performed using de-identified sera collected pre- and post-vaccination  
93 from 159 individuals with the approval of the University of Pennsylvania Institutional Review  
94 Board. Sera were pre-treated with receptor-destroying enzyme for 2 hours at 37°C and  
95 inactivated for 30 minutes at 55°C. Sera were also absorbed with 10% red blood cell solution  
96 for 1 hour at 4°C prior to completing HAI assay. We used influenza virus-like particles (VLPs)  
97 for the HAI assays in this study as previously described [9], since it is difficult to grow human  
98 H1N1 viruses without adaptive mutations. We used VLPs that expressed the 'wild-type'  
99 A/California/7/2009 H1N1 HA or the egg-adapted A/California/7/2009-X-179A H1N1 HA. The  
100 VLPs for these experiments possessed a neuraminidase (A/duck/Alberta/300/77) that most

101 humans have not been exposed to previously. We constructed our VLPs in this manner to  
102 avoid potential complications from neuraminidase-reactive antibodies. We also included 20nM  
103 of oseltamavir in our HAI assays to prevent neuraminidase binding of red blood cells [10]. The  
104 A/California/7/2009 wild-type HA and the A/California/7/2009-X-179A HA in our VLP constructs  
105 differ at 2 residues; the X-179A strain possesses a glutamine to arginine mutation at position  
106 226 (Q226R) and from lysine to threonine at position 212 (K212T). For some experiments we  
107 completed additional HAI assays using VLPs that expressed A/California/7/2009 HAs that were  
108 engineered to possess only the Q226R mutation that is in the RBS.

109

## 110 **Results**

111 We completed two independent HAI assays using sera from 159 individuals collected  
112 prior to and  $\geq 14$  days after vaccination. Vaccinated subjects ranged in age from 13 to 76 years  
113 old: 22 (14%) were  $\leq 18$  years old and 22 (14%) were  $\geq 50$  years old. We completed HAI assays  
114 with VLPs that possessed the A/California/7/2009 H1N1 wild-type HA or the  
115 A/California/7/2009-X-179A HA. The wild-type HA differs from the egg-adapted X-179A HA at  
116 residues 212 (K212T) and 226 (Q226R) (Figure 1). Residue 212 is somewhat buried within the  
117 trimer interface, whereas residue 226 is located directly in the RBS (Figure 1) and is known to  
118 impact receptor binding [11]. HAI titers from two independent experiments are shown for all  
119 participants in Supplemental Table 1.

120 We identified 8 participants (~5% of participants that we tested) that had antibody titers  
121 that were  $\geq 4$ -fold higher to the egg-adapted X-179A HA compared to the wild-type HA following  
122 vaccination in 2 independent HAI experiments (Supplemental Table 1). Some of these  
123 individuals possessed antibodies that reacted to the X-179A HA better than the WT HA prior to  
124 vaccination, which is likely the case because the X-179A vaccine strain has been utilized in the  
125 human population since 2009. However, some individuals clearly seroconverted against the X-  
126 179A HA but not the WT HA following vaccination in this study. For example, participant #81's

127 HAI titer against X-179A HA rose from a value of 15 pre-vaccination to a value of 100 post-  
128 vaccination but HAI titers in this individual against WT HA were nearly the same pre- and post-  
129 vaccination (pre-vaccination titer of 10 and post-vaccination titer of 25) (Supplemental Table 1;  
130 average HAI titer from 2 experiments described in text). Similarly, participant #147 was HAI  
131 negative against both HAs prior to vaccination and had a much higher HAI titer against X-179A  
132 HA (HAI titer of 70) compared to WT HA (HAI titer of 10) following vaccination (Supplemental  
133 Table 1; average HAI titer from 2 experiments described in text). These data indicate that the  
134 X-179A egg-adapted vaccine strain elicits and/or reinforces antibody responses that recognize  
135 the X-179A egg-adapted H1N1 HA more efficiently than the WT H1N1 HA in some individuals.

136 To confirm that the difference in WT HA versus X-179A HA reactivity was due to RBS  
137 differences, we completed additional HAI experiments using A/California/7/2009 HAs that were  
138 engineered to possess only the Q226R RBS HA mutation. HAI titers were lower using the WT  
139 HA compared to the HA with the Q226R mutation (Figure 2), indicating that the 8 individuals  
140 that we identified in our study possessed antibodies that targeted the egg-adapted RBS of the  
141 X-179A H1N1 vaccine strain.

142 Seven out of the 159 vaccinated individuals in this study had PCR-confirmed H1N1  
143 infection during the course of the 2015-16 season. All 7 of these individuals possessed low  
144 antibody titers against the WT H1N1 strain after vaccination (Supplemental Table 1).  
145 Importantly, one of the H1N1-infected participants (#131) had a higher HAI titer to the X-179A  
146 HA compared to the WT HA following vaccination, albeit titers to both HAs were low in this  
147 individual. From these studies, we conclude that some individuals vaccinated with the egg-  
148 adapted X-179A vaccine strain produce antibodies that recognize egg-adapted epitopes in the  
149 HA RBS and we speculate that this might contribute to reduced vaccine effectiveness.

150

151

152

## 153 **Discussion**

154 Human influenza viruses typically acquire mutations in and around the HA RBS that  
155 enhance virus binding to  $\alpha$ -2,3-linked sialic acids when grown in fertilized chicken eggs.  
156 Essentially all human influenza vaccines propagated in eggs possess egg-adapted HA  
157 mutations. Sometimes these mutations are located in classical antibody binding sites that lead  
158 to substantial vaccine mismatches, as was the case during the 2016-2017 H3N2-dominated  
159 influenza season [3]. More commonly, egg-grown vaccine strains possess adaptive mutations  
160 'buried' in the RBS, and it has been historically thought that these mutations are not as  
161 antigenically important. However, it is becoming clear that some human antibodies with long  
162 CDR3 domains physically make contact with residues deep within the RBS [4, 5], and a recent  
163 study isolated monoclonal antibodies from a vaccinated human that could bind to HAs with an  
164 egg-adapted RBS but not to non-egg adapted HAs that were present in viruses that circulated in  
165 humans [6]. Here, we set out to determine how common these types of antibodies are in  
166 vaccinated humans and if they are associated with vaccine failure.

167 We found that ~5% of individuals vaccinated with the 2015-2016 seasonal influenza  
168 vaccine possessed antibodies that recognized the X-179A H1N1 HA  $\geq$ 4-fold more efficiently  
169 compared to the WT H1N1 HA. Given that >140 million people receive a seasonal influenza  
170 vaccine in the U.S. each year [12], these data indicate that a large number of individuals (>7  
171 million!) possess antibodies that preferentially recognize the egg-adapted HA RBS of H1N1  
172 rather than the HA of H1N1 viruses that circulate in humans. For our study, we focused on  
173 individuals that had  $\geq$ 4-fold differences in HAI titers using the different HAs, and this  
174 conservative fold difference cutoff likely underestimates the number of individuals that possess  
175 antibodies that bind to the egg-adapted H1N1 strain but not the circulating H1N1 strain. It is  
176 notable that participants in our study come from a population with historically high annual  
177 vaccine uptake rates, and therefore they are likely to have had multiple previous influenza  
178 vaccines, as well as a low burden of chronic diseases that may impair antibody responses [13].

179 Consistent with this, several participants in our study possessed antibodies that recognized the  
180 X-179A HA more effectively than the WT HA prior to vaccination in 2015-2016. Since the egg-  
181 adapted H1N1 component of seasonal influenza vaccines remained unchanged between 2010-  
182 2016, it is possible that these participants developed this phenotype during an earlier  
183 vaccination and that these antibody responses were continually boosted by subsequent  
184 immunizations.

185 While most studies of egg-adaptation have focused on H3N2 viruses, our study clearly  
186 demonstrates that egg-adaptations in the HA RBS of H1N1 viruses can also be problematic.  
187 Antibodies targeting the RBS of HA have the potential to be broadly neutralizing if they are not  
188 restricted to binding only egg-adapted HAs [14, 15]. Our current reliance on eggs for the  
189 production of most seasonal influenza vaccines disfavors the generation of these types of  
190 broadly reactive antibodies. It is important to continue to develop new systems to prepare  
191 influenza vaccine antigens that are not dependent on viral growth in eggs, such as baculovirus  
192 and mammalian cell-based systems. Future studies should address if antigens produced in  
193 these alternative systems are more effective at eliciting antibodies that target the RBS of HAs  
194 that are actually present in human influenza virus strains.

195

## 196 **Notes**

### 197 **Financial support**

198 This work was supported by the National Institute of Allergy and Infectious Diseases  
199 (1R01AI113047, SEH; 1R01AI108686, SEH; 1R01AI097150, ASM; CEIRS  
200 HHSN272201400005C, SEH and ASM) and Center for Disease Control (U01IP000474, ASM).  
201 Scott E. Hensley, Ph.D. holds an Investigators in the Pathogenesis of Infectious Disease Award  
202 from the Burroughs Wellcome Fund.

203

204



205 **Potential conflicts of interest**

206 ASM has received grant support from Sanofi Pasteur and consultancy fees from Sanofi, GSK,  
207 and Novavax for work unrelated to this report. SEH has received consultancy fee from Lumen  
208 and Merck for work unrelated to this report. All other authors report no potential conflicts. All  
209 authors will submit the ICMJE Form for Disclosure of Potential Conflicts of Interest.

210

211 **References**

- 212 1. Skehel JJ, Wiley DC. Receptor binding and membrane fusion in virus entry: the influenza  
213 hemagglutinin. *Annual review of biochemistry* **2000**; 69:531-69.
- 214 2. Schultz-Cherry S, Jones JC. Influenza vaccines: the good, the bad, and the eggs. *Adv Virus*  
215 *Res* **2010**; 77:63-84.
- 216 3. Zost SJ, Parkhouse K, Gumina ME, et al. Contemporary H3N2 influenza viruses have a  
217 glycosylation site that alters binding of antibodies elicited by egg-adapted vaccine strains.  
218 *Proceedings of the National Academy of Sciences of the United States of America* **2017**;  
219 114:12578-83.
- 220 4. Whittle JR, Zhang R, Khurana S, et al. Broadly neutralizing human antibody that recognizes  
221 the receptor-binding pocket of influenza virus hemagglutinin. *Proceedings of the National*  
222 *Academy of Sciences of the United States of America* **2011**; 108:14216-21.
- 223 5. Schmidt AG, Therkelsen MD, Stewart S, et al. Viral receptor-binding site antibodies with  
224 diverse germline origins. *Cell* **2015**; 161:1026-34.
- 225 6. Raymond DD, Stewart SM, Lee J, et al. Influenza immunization elicits antibodies specific for  
226 an egg-adapted vaccine strain. *Nature medicine* **2016**; 22:1465-9.
- 227 7. Ohmit SE, Petrie JG, Malosh RE, et al. Substantial Influenza Vaccine Effectiveness in  
228 Households With Children During the 2013-2014 Influenza Season, When 2009 Pandemic  
229 Influenza A(H1N1) Virus Predominated. *The Journal of infectious diseases* **2016**; 213:1229-36.

- 230 8. Petrie JG, Parkhouse K, Ohmit SE, Malosh RE, Monto AS, Hensley SE. Antibodies Against  
231 the Current Influenza A(H1N1) Vaccine Strain Do Not Protect Some Individuals From Infection  
232 With Contemporary Circulating Influenza A(H1N1) Virus Strains. *The Journal of infectious*  
233 *diseases* **2016**; 214:1947-51.
- 234 9. Giles BM, Bissel SJ, Craigo JK, et al. Elicitation of anti-1918 influenza virus immunity early in  
235 life prevents morbidity and lower levels of lung infection by 2009 pandemic H1N1 influenza virus  
236 in aged mice. *Journal of virology* **2012**; 86:1500-13.
- 237 10. Chambers BS, Li Y, Hodinka RL, Hensley SE. Recent H3N2 Influenza Virus Clinical Isolates  
238 Rapidly Acquire Hemagglutinin or Neuraminidase Mutations When Propagated for Antigenic  
239 Analyses. *Journal of virology* **2014**; 88:10986-9.
- 240 11. Nicholls JM, Chan RW, Russell RJ, Air GM, Peiris JS. Evolving complexities of influenza  
241 virus and its receptors. *Trends in microbiology* **2008**; 16:149-57.
- 242 12. Available at: .
- 243 13. Petrie JG, Malosh RE, Cheng CK, et al. The Household Influenza Vaccine Effectiveness  
244 Study: Lack of Antibody Response and Protection Following Receipt of 2014-2015 Influenza  
245 Vaccine. *Clinical infectious diseases : an official publication of the Infectious Diseases Society*  
246 *of America* **2017**; 65:1644-51.
- 247 14. Wu NC, Wilson IA. A Perspective on the Structural and Functional Constraints for Immune  
248 Evasion: Insights from Influenza Virus. *J Mol Biol* **2017**; 429:2694-709.
- 249 15. Krammer F, Palese P, Steel J. Advances in universal influenza virus vaccine design and  
250 antibody mediated therapies based on conserved regions of the hemagglutinin. *Curr Top*  
251 *Microbiol Immunol* **2015**; 386:301-21.
- 252
- 253
- 254
- 255

256 **Figure Legends**

257 **Figure 1 – Differences between WT and X-179A HAs.** A side view (A) and top view (B) of the  
258 H1 trimer are shown (PDB ID code 3UBN). Residue 212 is shown in yellow and residue 226 is  
259 shown in red. The glycan receptor is shown in black.

260

261 **Figure 2 – Identification of individuals that possess antibodies that target the RBS of X-**  
262 **179A following vaccination.** HAI assays using VLPs with WT HA and HA engineered to  
263 possess the Q226R mutation were completed using sera from participants that had  $\geq 4$ -fold  
264 higher HAI titers to the egg-adapted X-179A HA compared to the wild-type HA as determined in  
265 Supplemental Table 1. Sera collected prior to (A) and after (B) vaccination were tested. Data  
266 are representative of 2 independent experiments.

**A** side view

**B** top view

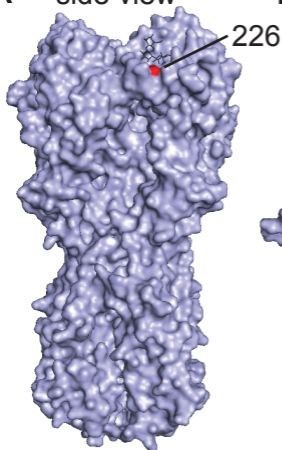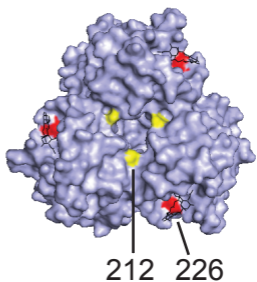

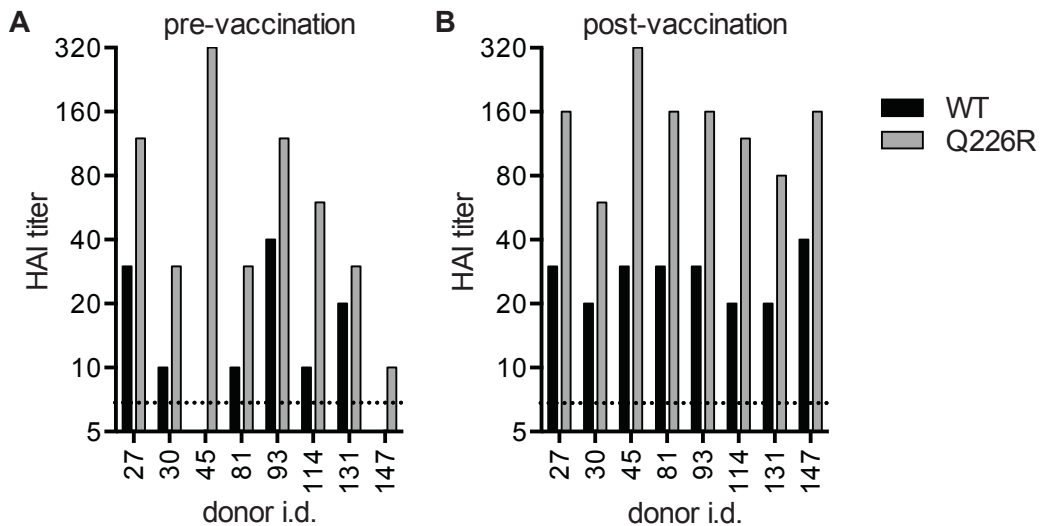

Source: https://www.biorxiv.org/content/10.1101/249615v1.full.pdf
